# Supplementary material for: Telenotarztsysteme im deutschen Rettungsdienst: eine nationale Sachstandserhebung
Source: Springer Nature journal article supplement (doi:10.1007/s10049-022-01063-3), 2022-08-16
Supplement: MOESM1 [file 23370266]

**Zusatzmaterial zum Beitrag „Telenotarztsysteme im deutschen Rettungsdienst: Eine nationale Sachstandserhebung“** von Rupp D, Benöhr P; König MK et al. (2022) in *Notfall+Rettenungsmedizin*

Beitrag und Zusatzmaterial stehen Ihnen auf [www.springermedizin.de](http://www.springermedizin.de) zur Verfügung. Bitte geben Sie dort den Beitragstitel in die Suche ein.

## Fragebogen Telenotarzt-System

(4 Fragenkomplexe)

### I Allgemeine Fragen

1. Was ist Ihre höchste Fachqualifikation im Rettungsdienst? (Einfachauswahl)
  - a. Rettungshelfer (RH)
  - b. Rettungssanitäter (RS)
  - c. Rettungsassistent (RA)
  - d. Lehrrettungsassistent (LRA)
  - e. Notfallsanitäter (NFS)
  - f. Notfallsanitäter mit Weiterbildung Praxisanleiter
  - g. Assistenzarzt
  - h. Facharzt
  
2. Welche Funktion(en) nehmen Sie im Rettungsdienst wahr? (Mehrfachauswahl)
  - a. Nebenamtlich als RH/RS/RA/LRA/NFS
  - b. Hauptamtlich als RH/RS/RA/LRA/NFS
  - c. Notarzt
  - d. Leitender Notarzt
  - e. Telenotarzt
  - f. Abteilungsleiter Rettungsdienst/(Nichtärztlicher) Leiter des Rettungsdienstes
  - g. Ärztlicher Leiter des Rettungsdienstes
  
3. Wie alt sind Sie?
  
4. Welchem Geschlecht gehören Sie an?
  - a. Männlich
  - b. Weiblich
  - c. Divers
  
5. In welchem Bundesland sind Sie primär tätig?  
- Dropdown-Auswahl
  
6. In welchem Rettungsdienstbereich sind Sie primär tätig?  
- Dropdown-Auswahl
  
7. In unserem Rettungsdienstbereich (Einfachauswahl)
  - a. gibt es kein Telenotarztsystem
  - b. ist ein Telenotarztsystem in Planung
  - c. gibt es in Teilbereichen ein Telenotarztsystem
  - d. gibt es ein Telenotarztsystem
    - Als Pilotprojekt
    - Als Regelbetrieb

## II Fragen zur Form eines Telenotarztsystems

(nur, wenn Frage 7 positiv beantwortet)

8. Von wo aus ist der Telenotarzt tätig?
  - a. Leitstelle
  - b. Klinik
  - c. Praxis
  - d. Mobiles Hintergrundsystem
  - e. Notarztbesetztes Rettungsmittel
  
9. Welche technischen Kommunikationsmittel stehen dem Telenotarzt-System zur Verfügung?  
(Mehrfachauswahl)
  - a. Telefon
  - b. Sonstige Sprechverbindung
  - c. Videotelefonie
  - d. Monitor-Livedaten Übertragung
  - e. Videokamera am Kopf des RD-Personal
  - f. Videokamera an der Einsatzkleidung des RD-Personal
  - g. Videokamera am EKG
  - h. Videokamera in der Decke des RTW
  - i. Sonstige -> Welche?
  
10. Welche Kommunikationstechnik findet in Ihrem Telenotarzt-System **regelmäßig** Anwendung?  
(Mehrfachauswahl)
  - a. Telefon
  - b. Sonstige Sprechverbindung
  - c. Videotelefonie
  - d. Monitor-Livedaten Übertragung
  - e. Videokamera am Kopf des RD-Personal
  - f. Videokamera an der Einsatzkleidung des RD-Personal
  - g. Videokamera am EKG
  - h. Videokamera in der Decke des RTW
  - i. Sonstige -> Welche?
  
11. Wie wird das Telenotarzt-System bei Einsätzen **ohne** primäre Notarztindikation genutzt?  
(Einfachauswahl)
  - a. Es gibt keine Standardarbeitsanweisungen, der Telenotarzt wird daher regelmäßig kontaktiert.
  - b. Es gibt umfangreiche Standardarbeitsanweisungen, additiv kann ein Telenotarzt bei Problemen kontaktiert werden.
  - c. Bei Einsätzen mit Notarznachforderung überbrückt der Telenotarzt immer die Zeit bis zum Eintreffen des realen Notarztes.
  - d. Sonstiges.
  
12. Wie wird das Telenotarzt-System bei Einsätzen **mit** primärer Notarztindikation genutzt?  
(Mehrfachauswahl)
  - a. Augenscheinlich unkompliziert gemeldete Notrufe mit Notarztindikation werden regulär vom Telenotarzt abgedeckt, nur in komplizierten Fällen wird ein (an der Einsatzstelle physisch anwesender) Notarzt mit alarmiert.

- b. Auch augenscheinlich kompliziert gemeldete Einsätze mit Notarztindikation werden regulär vom Telenotarzt abgedeckt, gegebenenfalls kann ein realer Notarzt nachgefordert werden.
- c. Bei Einsätzen mit primärer Notarztindikation werden von Anfang an immer sowohl der Telenotarzt als auch ein zum Einsatzort entsendeter Notarzt eingebunden.
- d. Ein vor Ort befindlicher Notarzt kann sich vom Telenotarzt auf Anforderung unterstützt lassen.
- e. Der Telenotarzt kann sich als Supervisor jederzeit selbstständig in Einsätze einbinden.
- f. Sonstiges.

13. Wie wird das Telenotarzt-System beim **Intensivtransport** (Sekundärtransport) genutzt? (Mehrfachauswahl)

- a. Der Telenotarzt führt eine Notarzt-Indikationsüberprüfung vor dem Sekundärtransport durch.
- b. Der Telenotarzt begleitet in Ausnahmefällen Sekundärtransporte.
- c. Der Telenotarzt begleitet regelhaft (statt eines physischen Notarztes) einfache Sekundärtransporte (z.B. stabile Patienten ohne Beatmung und/oder herzkreislaufwirksame Medikamente).
- d. Der Telenotarzt begleitet regelhaft (statt eines physischen Notarztes) auch komplexe Sekundärtransporte (z.B. Patienten mit Beatmung und/oder herzkreislaufwirksame Medikamente).
- e. Der Telenotarzt wird im Rahmen von Intensivtransporten nicht eingesetzt.

### III Fragen zu medizinischen Einsatzszenarien

(alle Teilnehmer)

14. Im Fall einer Mitfahrverweigerung durch den Patienten gegenüber einer Besatzung eines RTW (Einfachauswahl)

- a. Erfolgt die Dokumentation durch die RTW-Besatzung ohne weiteren Arztkontakt.
- b. Hängt es von der Komplexität ab.
- c. Wird zur Aufklärung und Dokumentation ein Notarzt nachgefordert.
- d. Wird zur Aufklärung und Dokumentation ein sonstiger Arzt (z.B. KV-Arzt) angefordert.
- e. Wird ein Telenotarzt eingebunden.

15. Im Fall einer nur geringfügigen Erkrankung/Verletzung, die nach Einschätzung der RTW-Besatzung keinen Transport in ein Krankenhaus erfordert (Einfachauswahl)

- a. Erfolgt die Dokumentation und abschließende Versorgung durch die RTW-Besatzung ohne weiteren Arztkontakt (Patient verbleibt am Einsatzort).
- b. Wird zur Dokumentation und Diagnosesicherung ein Notarzt nachgefordert.
- c. Wird zur Dokumentation und Diagnosesicherung ein sonstiger Arzt (z.B. KV-Arzt) angefordert.
- d. Wird zur Dokumentation und Diagnosesicherung ein Telenotarzt eingebunden.

16. Für Einsatzszenarien des RTW ohne primäre Notarztalarmierung existieren in unserem Rettungsdienstbereich (Einfachauswahl)

- a. Umfassende Standardarbeitsanweisungen, die eine **eigenständige Durchführung** bestimmter Medikamentengaben **ohne Notarznachforderung** und **ohne Telenotarzteinbindung** beinhalten.

- b. Umfassende Standardarbeitsanweisungen, die eine **eigenständige Durchführung** bestimmter Medikamentengaben **ohne Notarznachforderung**, aber **mit Telenotarzteinbindung** beinhalten.
  - c. Umfassende Standardarbeitsanweisungen, die eine **eigenständige Durchführung** bestimmter Medikamentengaben **mit Notarznachforderung** und **ohne Telenotarzteinbindung** beinhalten.
  - d. Umfassende Standardarbeitsanweisungen, die eine **eigenständige Durchführung** bestimmter Medikamentengaben **fallabhängig mit Notarznachforderung** oder **mit Telenotarzteinbindung** vorsehen.
  - e. Umfassende Standardarbeitsanweisungen, die eine **eigenständige Durchführung** bestimmter Medikamentengaben **mit Notarznachforderung** und **mit zusätzlicher Telenotarzteinbindung** beinhalten.
  - f. Umfassende Standardarbeitsanweisungen, die eine **eigenständige Durchführung** bestimmter Medikamentengaben **nicht vorsehen**.
  - g. Es existieren **keine oder nur wenige Standardarbeitsanweisungen**, die nicht die Mehrzahl an Einsatzszenarien abbilden.
17. Ein intravenöser Zugang wird durch ein RTW-Besatzung ohne Notarzt (Einfachauswahl)
- a. entsprechend der Standardarbeitsanweisung eigenständig gelegt.
  - b. nur nach Rücksprache mit Telenotarzt gelegt.
  - c. nicht oder nur in Ausnahmefällen gelegt.
18. Eine intravenöse Analgesie durch Notfallsanitäter bei Notfallpatienten ohne ABC-Problem erfolgt in unserem Rettungsdienstbereich (Einfachauswahl)
- a. nach Standardarbeitsanweisung ohne Notarzt/Telenotarzt.
  - b. nach Standardarbeitsanweisung ohne Notarzt mit Telenotarzteinbindung nur im Bedarfsfall (z.B. bei Rückfragen/Komplikationen).
  - c. nach Standardarbeitsanweisung ohne Notarzt mit regelhafter Telenotarzteinbindung.
  - d. nach Standardarbeitsanweisung mit Notarznachforderung ohne Telenotarzteinbindung.
  - e. nach Standardarbeitsanweisung mit Notarznachforderung und zusätzlicher Telenotarzteinbindung.
  - f. ohne Standardarbeitsanweisung ohne Notarzt/Telenotarzt.
  - g. ohne Standardarbeitsanweisung mit Notarznachforderung.
  - h. grundsätzlich nicht.
  - i. Sonstiges: FREITEXT
19. Die intravenöse Gabe von Glucose bei Hypoglykämie erfolgt in unserem Rettungsdienstbereich (Einfachauswahl)
- a. nach Standardarbeitsanweisung ohne Notarzt/Telenotarzt.
  - b. nach Standardarbeitsanweisung ohne Notarzt mit Telenotarzteinbindung nur im Bedarfsfall (z.B. bei Rückfragen/Komplikationen).
  - c. nach Standardarbeitsanweisung ohne Notarzt mit regelhafter Telenotarzteinbindung.
  - d. nach Standardarbeitsanweisung mit Notarznachforderung ohne Telenotarzteinbindung.
  - e. nach Standardarbeitsanweisung mit Notarznachforderung und zusätzlicher Telenotarzteinbindung.
  - f. ohne Standardarbeitsanweisung ohne Notarzt/Telenotarzt.
  - g. ohne Standardarbeitsanweisung mit Notarznachforderung.
  - h. grundsätzlich nicht.
  - i. Sonstiges: FREITEXT

20. Die intravenöse Gabe von ASS beim Akuten Koronarsyndrom ohne ST-Hebung und ohne ABC Problem durch die RTW-Besatzung erfolgt in unserem Rettungsdienstbereich (Einfachauswahl)
- nach Standardarbeitsanweisung ohne Notarzt/Telenotarzt.
  - nach Standardarbeitsanweisung ohne Notarzt mit Telenotarzteinbindung nur im Bedarfsfall (z.B. bei Rückfragen/Komplikationen).
  - nach Standardarbeitsanweisung ohne Notarzt mit regelhafter Telenotarzteinbindung.
  - nach Standardarbeitsanweisung mit Notarzteinbindung ohne Telenotarzteinbindung.
  - nach Standardarbeitsanweisung mit Notarzteinbindung und zusätzlicher Telenotarzteinbindung.
  - ohne Standardarbeitsanweisung ohne Notarzt/Telenotarzt.
  - ohne Standardarbeitsanweisung mit Notarzteinbindung.
  - grundsätzlich nicht.
  - Sonstiges: FREITEXT
21. Die intravenöse Gabe von Antihypertensiva bei hypertensiver Krise ohne ABC-Problem erfolgt in unserem Rettungsdienstbereich (Einfachauswahl)
- nach Standardarbeitsanweisung ohne Notarzt/Telenotarzt.
  - nach Standardarbeitsanweisung ohne Notarzt mit Telenotarzteinbindung nur im Bedarfsfall (z.B. bei Rückfragen/Komplikationen).
  - nach Standardarbeitsanweisung ohne Notarzt mit regelhafter Telenotarzteinbindung.
  - nach Standardarbeitsanweisung mit Notarzteinbindung ohne Telenotarzteinbindung.
  - nach Standardarbeitsanweisung mit Notarzteinbindung und zusätzlicher Telenotarzteinbindung.
  - ohne Standardarbeitsanweisung ohne Notarzt/Telenotarzt.
  - ohne Standardarbeitsanweisung mit Notarzteinbindung.
  - grundsätzlich nicht.
  - Sonstiges: FREITEXT
22. Die Versorgung einschließlich Transport von Patienten mit Schlaganfall ohne ABC-Problem durch einen RTW erfolgt in unserem Rettungsdienstbereich (Einfachauswahl)
- nach Standardarbeitsanweisung ohne Notarzt/Telenotarzt.
  - nach Standardarbeitsanweisung ohne Notarzt mit Telenotarzteinbindung nur im Bedarfsfall (z.B. bei Rückfragen/Komplikationen).
  - nach Standardarbeitsanweisung ohne Notarzt mit regelhafter Telenotarzteinbindung.
  - nach Standardarbeitsanweisung mit Notarzteinbindung ohne Telenotarzteinbindung.
  - nach Standardarbeitsanweisung mit Notarzteinbindung und zusätzlicher Telenotarzteinbindung.
  - ohne Standardarbeitsanweisung ohne Notarzt/Telenotarzt.
  - ohne Standardarbeitsanweisung mit Notarzteinbindung.
  - grundsätzlich nicht.
  - Sonstiges: FREITEXT

#### **IV Fragen zur persönlichen Einschätzung**

23. Um ein Telenotarztsystem sinnvoll zu betreiben, sind aus meiner Sicht folgende technischen Ausstattungen notwendig/ausreichend (Mehrfachauswahl)
- Telefon
  - Videotelefon
  - Videotelefon inklusive Telemetrie (bspw. die Übertragung eines EKGs)
  - Livedaten/Telemetrie
24. Der Telenotarzt kann mein Wissen vor Ort verbessern beziehungsweise Wissenslücken schließen  
1 = trifft sehr zu bis 6 = trifft überhaupt nicht zu
25. Der Telenotarzt kann meine Fertigkeiten vor Ort durch Rat verbessern  
1 = trifft sehr zu bis 6 = trifft überhaupt nicht zu
26. Der Telenotarzt gibt mir Rechtssicherheit  
1 = trifft sehr zu bis 6 = trifft überhaupt nicht zu
27. Der Telenotarzt soll nur die Zeit bis zum Eintreffen des physischen Notarztes überbrücken  
1 = trifft sehr zu bis 6 = trifft überhaupt nicht zu
28. Der Telenotarzt soll einen physischen Notarzt komplett ersetzen  
1 = trifft sehr zu bis 6 = trifft überhaupt nicht zu
29. Das Ziel meines Kontaktes zum Telenotarzt muss sein, dass ich (Mehrfachauswahl)
- rechtlich abgesichert bin.
  - eine invasive Maßnahme selbständig durchführen kann.
  - keinen Arzt mehr vor Ort benötige.
  - gesagt bekomme, was zu tun ist.
30. Bewerten Sie abschließend die Sinnhaftigkeit eines Telenotarzt-Systems  
1 = sehr sinnvoll bis 6 = überhaupt nicht sinnvoll
