# Supplementary material for: Telenotarztsysteme im deutschen Rettungsdienst: eine nationale Sachstandserhebung
Source: Springer Nature journal article supplement (doi:10.1007/s10049-022-01063-3), 2022-08-16
Supplement: MOESM2 [file 23370266]

**Zusatzmaterial zum Beitrag „Telenotarztsysteme im deutschen Rettungsdienst: Eine nationale Sachstandserhebung“** von Rupp D, Benöhr P; König MK et al. (2022) in *Notfall+Rettenungsmedizin*

Beitrag und Zusatzmaterial stehen Ihnen auf [www.springermedizin.de](http://www.springermedizin.de) zur Verfügung. Bitte geben Sie dort den Beitragstitel in die Suche ein.

*Angaben zur eigenständigen Glukosegabe durch Rettungsfachpersonal (n=984). Bundesländer im Vergleich.*

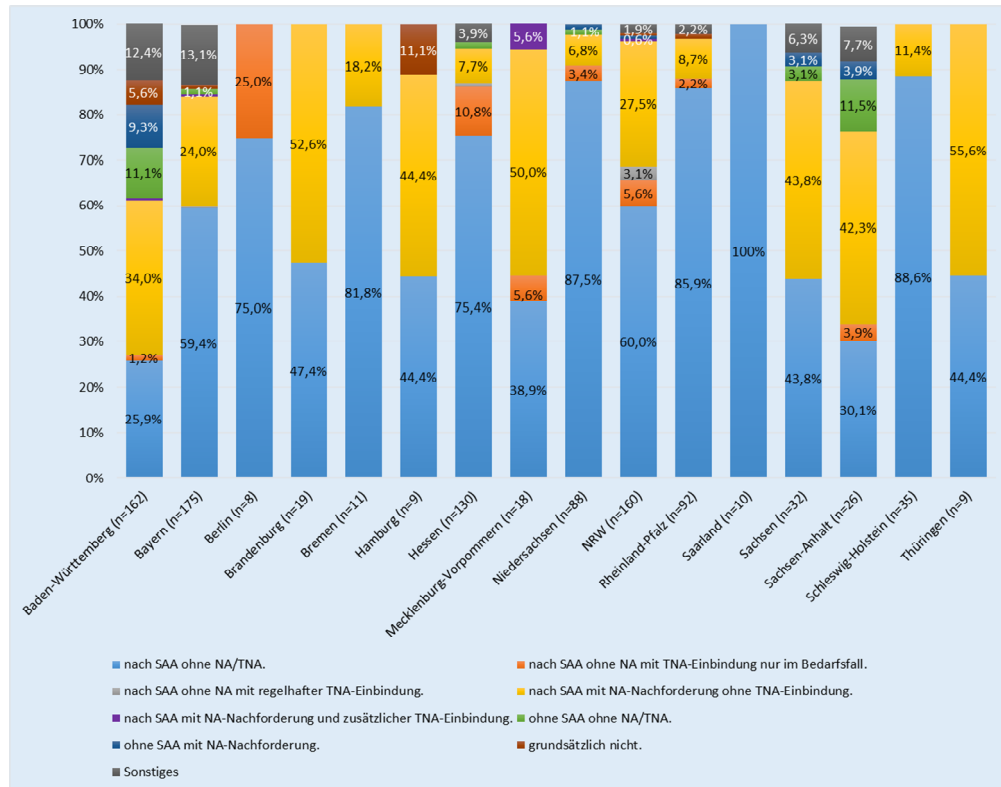

*Anzahl Teilnehmende nach Bundesland sowie Anteil der damit abgedeckten RDB<sup>a</sup>*

| Bundesland             | Teilnehmende (n) | Anteil abgedeckte RDB % |
|------------------------|------------------|-------------------------|
| Baden-Württemberg      | 166              | 95,2%                   |
| Bayern                 | 180              | 75,3%                   |
| Berlin                 | 8                | 100%                    |
| Brandenburg            | 19               | 61,1%                   |
| Bremen                 | 11               | 50,0%                   |
| Hamburg                | 11               | 100%                    |
| Hessen                 | 132              | 92,3%                   |
| Mecklenburg-Vorpommern | 23               | 87,5%                   |
| Niedersachsen          | 90               | 68,9%                   |
| Nordrhein-Westfalen    | 173              | 84,9%                   |
| Rheinland-Pfalz        | 92               | 72,2%                   |
| Saarland               | 11               | 50,0%                   |
| Sachsen                | 35               | 92,3%                   |
| Sachsen-Anhalt         | 27               | 92,9%                   |
| Schleswig-Holstein     | 36               | 80,0%                   |
| Thüringen              | 9                | 34,8%                   |
| <b>Gesamt</b>          | <b>1.023</b>     | <b>77,1%</b>            |

<sup>a</sup>Frage: In welchem Bundesland und in welchem RDB sind Sie tätig?
